# Supplementary material
Source: publisher site journal article supplement (https://www.dovepress.com/article/578770)
Supplement: Supplementary file 1 [file 578770%20Supplementary%20Material.docx]

**Supplementary Table 1. CONSORT 2010 checklist**

| Section/Topic | Item No | Checklist item | Reported on page No |
| --- | --- | --- | --- |
| Title and abstract | | | |
|  | 1a | Identification as a randomised trial in the title | 1 |
| 1b | Structured summary of trial design, methods, results, and conclusions (for specific guidance see CONSORT for abstracts) | 1 |
| Introduction | | | |
| Background and objectives | 2a | Scientific background and explanation of rationale | 1-2 |
| 2b | Specific objectives or hypotheses | 2 |
| Methods | | | |
| Trial design | 3a | Description of trial design (such as parallel, factorial) including allocation ratio | 2-3 |
| 3b | Important changes to methods after trial commencement (such as eligibility criteria), with reasons | Supplementary table 2 |
| Participants | 4a | Eligibility criteria for participants | 3 |
| 4b | Settings and locations where the data were collected | 2 |
| Interventions | 5 | The interventions for each group with sufficient details to allow replication, including how and when they were actually administered | 3 |
| Outcomes | 6a | Completely defined pre-specified primary and secondary outcome measures, including how and when they were assessed | 3-4 |
| 6b | Any changes to trial outcomes after the trial commenced, with reasons | Supplementary table 2 |
| Sample size | 7a | How sample size was determined | 4 |
| 7b | When applicable, explanation of any interim analyses and stopping guidelines | NA |
| **Randomisation** |  |  |  |
| Sequence generation | 8a | Method used to generate the random allocation sequence | 2 |
| 8b | Type of randomisation; details of any restriction (such as blocking and block size) | 2 |
| Allocation concealment mechanism | 9 | Mechanism used to implement the random allocation sequence (such as sequentially numbered containers), describing any steps taken to conceal the sequence until interventions were assigned | 2 |
| Implementation | 10 | Who generated the random allocation sequence, who enrolled participants, and who assigned participants to interventions | 2 |
| Blinding | 11a | If done, who was blinded after assignment to interventions (for example, participants, care providers, those assessing outcomes) and how | 2-3 |
| 11b | If relevant, description of the similarity of interventions | 3 |
| Statistical methods | 12a | Statistical methods used to compare groups for primary and secondary outcomes | 4 |
| 12b | Methods for additional analyses, such as subgroup analyses and adjusted analyses | Supplementary table 2 |
| Results | | | |
| Participant flow (a diagram is strongly recommended) | 13a | For each group, the numbers of participants who were randomly assigned, received intended treatment, and were analysed for the primary outcome | 5, Figure 1 |
| 13b | For each group, losses and exclusions after randomisation, together with reasons | Figure 1 |
| Recruitment | 14a | Dates defining the periods of recruitment and follow-up | 5 |
| 14b | Why the trial ended or was stopped | NA |
| Baseline data | 15 | A table showing baseline demographic and clinical characteristics for each group | Table 1 |
| Numbers analysed | 16 | For each group, number of participants (denominator) included in each analysis and whether the analysis was by original assigned groups | 5, Figure 1 |
| Outcomes and estimation | 17a | For each primary and secondary outcome, results for each group, and the estimated effect size and its precision (such as 95% confidence interval) | 7-9,Table 2-4, Figure 2, Supplementary table 5-6, |
| 17b | For binary outcomes, presentation of both absolute and relative effect sizes is recommended | 7, Table 2 |
| Ancillary analyses | 18 | Results of any other analyses performed, including subgroup analyses and adjusted analyses, distinguishing pre-specified from exploratory | 9,Supplementary table 7-8 |
| Harms | 19 | All important harms or unintended effects in each group (for specific guidance see CONSORT for harms) | 3-4 |
| Discussion | | | |
| Limitations | 20 | Trial limitations, addressing sources of potential bias, imprecision, and, if relevant, multiplicity of analyses | 11-12 |
| Generalisability | 21 | Generalisability (external validity, applicability) of the trial findings | 12 |
| Interpretation | 22 | Interpretation consistent with results, balancing benefits and harms, and considering other relevant evidence | 10-12 |
| Other information | | |  |
| Registration | 23 | Registration number and name of trial registry | 1 |
| Protocol | 24 | Where the full trial protocol can be accessed, if available | 2 |
| Funding | 25 | Sources of funding and other support (such as supply of drugs), role of funders | 13 |

Note: The CONSORT table was adapted from Schulz KF, Altman DG, Moher D, et al. CONSORT 2010 statement: updated guidelines for reporting parallel group randomized trials. *Ann Intern Med*. 2010;152(11):726-732.PMID: 20335313. doi:10.7326/0003-4819-152-11-201006010-00232

**Supplementary Table 2. Deviations between the Protocol and the Trial Implementation**

| **Domain** | **Protocol specification** | **Trial implementation** | **Rationale** |
| --- | --- | --- | --- |
| **Sample size** | Target = 80 | Final = 82 | During the recruitment process, several eligible participants enrolled simultaneously. |
| **Primary outcome** | ISI score reduction from week 0 to week 8 | ISI score reduction from week 0 to week 8 and insomnia remission rate at week 8 | Remission rate provides greater clinical interpretability and complements continuous ISI change; both outcomes are based on the same instrument and showed consistent results. |
| **Secondary outcomes** | ATSPPH-SF, DBAS-16, FFMQ specified as secondary outcomes | Not reported in the current manuscript | These measures are exploratory and mechanism oriented. In this report, we maintain focus on sleep outcomes and avoid outcome overload, analyses are deferred to future reports. |
| **Statistical software** | SPSS version 25.0 | SPSS version 26.0 | Minor technical update with no impact on analytical approach or results. |
| **Statistical significance threshold** | Two-sided *p* < 0.05 | Multiple comparison correction applied | Implemented to reduce the risk of type I error given multiple secondary outcomes. |
| **Primary outcome analysis** | Univariable linear regression for ISI reduction | Effect size (Cohen’s *d*) reported | Cohen’s *d* facilitates clinical interpretability and comparability with prior insomnia trials. |
| **Secondary outcome analysis** | No explicit hierarchy specified among secondary outcomes | Secondary outcomes were grouped into conceptual families and analyzed hierarchically | To reduce inflation of type I error associated with multiple secondary outcomes. |
| **Sensitivity analysis** | Multivariable linear regression adjusting for demographic covariates and baseline ISI | Sensitivity analysis addressing missing actigraphy data at week 20 | Missing data at long-term follow-up could be a more relevant source of bias. |
| **Exploratory analyses** | Subgroup analyses, dose–response analysis, and structural equation models for mediators or moderators | Not conducted in the current manuscript | These analyses are ongoing and will be reported separately to avoid overinterpretation. |

**Note:** ISI: Insomnia Severity Index; ATSPPH-SF: The Attitudes Toward Seeking Professional Psychological Help Scale-Short Form; DBAS-16: Dysfunctional Beliefs and Attitudes about Sleep Scale 16-item version; FFMQ: The Five Facet Mindfulness Questionnaire

**Supplementary Table 3. The outline of the 8-week iMBCT-I program**

| **Session theme** | **Main content** |
| --- | --- |
| **Session 1 (90 mins):**  Awareness and Automatic Pilot | - Brief introduction to CBT-I and its effects on insomnia - How to keep sleep diaries and calculate sleep efficiency - Development and implementation of sleep restriction - Stimulus control guidelines - Brief introduction to mindfulness and its effects on insomnia - Mindfulness practices and discussion |
| **Session 2 (90 mins):**  Recognizing the Dysfunctional Beliefs in Insomnia | - Recognizing dysfunctional beliefs **and habits** - 7-step of cognitive restructuring - Discussion and feedback on homework - Using “Pleasant Event Records” to track the relationship between emotions and thoughts - Mindfulness practices and discussion |
| **Session 3 (90 mins):**  Thoughts Are Not Facts | - Recognizing dysfunctional beliefs **and habits** - Discussion and feedback on homework - Introducing the concept that “thoughts are not facts” - Using “Unpleasant Event Records” to track the relationship between emotions and thoughts - Mindfulness practices and discussion |
| **Session 4 (90 mins):**  A New Perspective | - Recognizing dysfunctional beliefs **and habits** - Discussion and feedback on homework - Mindfulness practices and discussion |
| **Session 5 (90 mins):**  Awareness is the Start of Change | - Recognizing dysfunctional beliefs **and habits** - Challenging catastrophic thinking and dysfunctional beliefs related to sleep - Discussion and feedback on homework - Learning to observe thoughts non-judgmentally - Mindfulness practices and discussion |
| **Session 6 (90 mins):**  Allowing/Letting Be | - Discussion and feedback on homework - Mindfulness practices and review - Fostering an attitude of acceptance toward internal experiences - Interactive feedback session |
| **Session 7 (90 mins):**  How Can I Best Take Care of Myself? | - Discussion and feedback on homework - Developing personalized early warning systems and action plans for insomnia relapse - Identifying nurturing and energy-draining activities - Mindfulness practices and review - Interactive feedback session |
| **Session 8 (90 mins):**  Maintaining and Extending New Learning | - Mindfulness practices and discussion - Discussing strategies to maintain motivation for long-term self-care - Conclude the course, share blessings, expectations, and future arrangements |

### Supplementary Table 4. Number and Reasons for Missing Data on Sleep Diary and Actigraphy

| Group | Timepoint | Sleep diary | | Actigraphy | |
| --- | --- | --- | --- | --- | --- |
| *n* | Reasons | *n* | Reasons |
| iMBCT-I | week 0 | 0 | / | 0 | / |
| week 8 | 4 | Forgot to write (*n* = 1)  Refuse to keep (*n* = 2)  No response (*n* = 1) | 3 | Forgot to wear (*n* = 2) Device lost (*n* = 1) |
| week 20 | 8 | Lost to follow-up (*n* = 5)  Refuse to keep (*n* = 2)  No response (*n* = 1) | 6 | Lost to follow-up (*n* = 5)  Device lost (*n* = 1) |
| SHE | week 0 | 0 | / | 0 | / |
| week 8 | 4 | Lost to follow-up (*n* = 1)  Refuse to keep (*n* = 2)  No response (*n* = 1) | 3 | Lost to follow-up (*n* = 1)  Forgot to wear (*n* = 1) Device lost (*n* = 1) |
| week 20 | 11 | Lost to follow-up (*n* = 6)  Forgot to write (*n* = 3)  Refuse to keep (*n* = 1)  No response (*n* = 1) | 13 | Lost to follow-up (*n* = 6)  Forgot to wear (*n* = 3) Device lost (*n* = 3)  Device malfunction (*n* = 1) |

**Note:** iMBCT-I: internet-delivered Mindfulness-Based Cognitive Therapy for Insomnia; SHE: Sleep Hygiene Education

**Supplementary Table 5. Comparison of the Mean Change Scores of Each Sleep Architecture from Week 0 to Week 8 (ITT analysis)**

| Outcome | iMBCT-I (*n* = 41) | SHE(*n* = 41) | Between-Group Difference  (95% CI) | *t* | *p* |
| --- | --- | --- | --- | --- | --- |
| Mean (*SD*) | Mean (*SD*) |
| Deep sleep (min) | -0.36 (14.26) | 3.11 (12.94) | -3.47 (-9.46,2.51) | -1.154 | 0.252 |
| Light sleep (min) | 14.36 (26.04) | 1.79 (23.60) | 12.56 (1.64, 23.49) | 2.289 | 0.025 |
| REM sleep (min) | 22.03 (17.68) | 6.98 (12.65) | 15.05 (8.30, 21.81) | 4.434 | <0.001 |

**Note:** Missing data were imputed using Last Observation Carried Forward (LOCF); iMBCT-I: internet-delivered Mindfulness-Based Cognitive Therapy for Insomnia; SHE: Sleep Hygiene Education; ITT: intention-to-treat ; SD: standard deviation; 95% CI: 95% Confidence Interval

**Supplementary Table 6. Efficacy of Primary and Secondary Outcomes at Follow-up Points: Mixed Effects Model Analysis** **(ITT analysis)**

| Outcome | iMBCT-I | | SHE | | Cohen's *d* | | *p* | | |
| --- | --- | --- | --- | --- | --- | --- | --- | --- | --- |
| EMM (SE) | 95% CI | EMM (SE) | 95% CI | Group effect | Time effect | Interaction effect (Group×Time) |
| Insomnia Severity Index, ISI (score) | | | | | | | | | |
| Week 8 | 8.14 (0.63) | 6.90, 9.38 | 12.30 (2.39) | 11.04, 13.56 | -1.43 | | <0.001 | 0.857 | 0.638 |
| Week 20 | 7.83 (0.66) | 6.52, 9.13 | 12.44 (2.64) | 11.12, 13.76 | -1.58 | |
| Sleep diary | | | | | | | | | |
| Sleep onset latency, SOL (min) | | | | | | | | | |
| Week 8 | 36.67 (3.13) | 30.47, 42.87 | 56.51 (3.13) | 50.32, 62.70 | -1.29 | | <0.001 | 0.008 | 0.727 |
| Week 20 | 29.95 (3.28) | 23.45, 36.44 | 47.83 (3.73) | 40.47, 55.20 | -1.16 | |
| Number of awakenings | | | | | | | | | |
| Week 8 | 1.12 (0.11) | 0.92, 1.33 | 1.38 (0.10) | 1.17, 1.58 | -0.48 | | 0.002 | 0.246 | 0.125 |
| Week 20 | 1.09 (0.11) | 0.87, 1.30 | 1.63 (0.12) | 1.39, 1.88 | -1.05 | |
| Wake time after sleep onset, WASO (min) | | | | |  |  |  | |  |
| Week 8 | 13.87 (2.40) | 9.13, 18.62 | 43.19 (2.39) | 38.45, 47.92 | -2.45 | | <0.001 | 0.521 | 0.264 |
| Week 20 | 17.54 (2.52) | 12.56, 22.53 | 42.19 (2.64) | 36.97, 47.40 | -2.06 | |
| Total sleep time, TST (min) | | | | | | | | | |
| Week 8 | 384.13 (6.40) | 371.47, 396.79 | 352.95 (6.43) | 340.24, 365.67 | 0.79 | | 0.004 | 0.189 | 0.094 |
| Week 20 | 363.67 (6.77) | 350.27, 377.06 | 355.46 (7.08) | 341.46, 369.46 | 0.21 | |
| Sleep efficiency, SE | | | | | | | | | |
| Week 8 | 0.89 (0.02) | 0.86, 0.92 | 0.78 (0.0.02) | 0.75, 0.81 | 1.19 | | <0.001 | 0.947 | 0.534 |
| Week 20 | 0.88 (0.02) | 0.85, 0.92 | 0.79 (0.02) | 0.76, 0.83 | 0.98 | |
| Pittsburgh Sleep Quality Index, PSQI (score) | | | | | | | | | |
| Week 8 | 8.14 (0.33) | 7.49,8.80 | 10.22 (0.34) | 9.56, 10.88 | -1.38 | | <0.001 | 0.100 | 0.864 |
| Week 20 | 8.61 (0.37) | 7.88. 9.34 | 10.60 (0.35) | 9.91, 11.29 | -1.32 | |
| Patient Health Questionnaire-9, PHQ-9 (score) | | | | | | | | | |
| Week 8 | 5.78 (0.65) | 4.51, 7.06 | 7.69 (0.65) | 6.42, 8.97 | -0.54 | | 0.079 | 0.235 | 0.322 |
| Week 20 | 7.05 (0.69) | 5.69, 8.40 | 7.81 (0.70) | 6.43, 9.18 | -0.22 | |
| Generalized Anxiety Disorder 7-item scale, GAD-7 (score) | | | | | | | | | |
| Week 8 | 3.92 (0.64) | 2.65, 5.19 | 4.44 (0.65) | 3.15, 5.72 | -0.15 | | 0.218 | 0.036 | 0.451 |
| Week 20 | 4.69 (0.68) | 3.34, 6.03 | 6.05 (0.69) | 4.69, 7.41 | -0.40 | |
| 12-item Short Form Health Survey, SF-12 (score) | | | | | | | | | |
| Physical Component Summary, PCS (score) | | | | | | | | | |
| Week 8 | 48.93 (0.83) | 47.29, 50.57 | 45.93 (0.84) | 44.27, 47.59 | 0.83 | | 0.047 | 0.735 | 0.148 |
| Week 20 | 47.85 (0.87) | 46.14, 49.57 | 46.61 (0.88) | 44.87, 48.35 | 0.34 | |
| Mental Component Summary, MCS (score) | | | | | | | | | |
| Week 8 | 46.68 (0.98) | 44.74, 48.62 | 43.62 (1.00) | 41.65, 45.59 | 0.61 | | 0.004 | 0.205 | 0.614 |
| Week 20 | 46.05 (1.04) | 43.99, 48.10 | 42.14 (1.05) | 40.06, 44.23 | 0.77 | |
| Actigraphy | | | | | | | | | |
| Number of awakenings | | | | | | | | | |
| Week 8 | 1.18 (0.12) | 0.94, 1.42 | 1.44 (0.12) | 1.21, 1.68 | -0.41 | | 0.003 | 0.468 | 0.163 |
| Week 20 | 1.10 (0.12) | 0.86, 1.35 | 1.68 (0.14) | 1.41, 1.96 | -0.90 | |
| Wake time after sleep onset, WASO (min) | | | | | | | | | |
| Week 8 | 30.73 (2.26) | 26.25, 35.21 | 43.39 (2.26) | 38.91, 47.87 | -1.30 | | <0.001 | 0.033 | 0.362 |
| Week 20 | 28.58 (2.33) | 23.96, 33.20 | 38.11 (2.54) | 33.09, 43.14 | -0.98 | |
| Total sleep time, TST (min) | | | | | | | | | |
| Week 8 | 398.06 (4.04) | 390.04, 406.08 | 372.32 (4.04) | 364.31, 380.34 | 1.65 | | 0.001 | 0.184 | 0.007 |
| Week 20 | 394.10 (4.15) | 385.87, 402.32 | 383.68 (4.48) | 374.81, 392.54 | 0.60 | |
| Deep sleep duration (min) | | | | | | | | | |
| Week 8 | 86.67 (1.78) | 83.12, 90.21 | 87.22 (1.78) | 83.69, 90.76 | -0.10 | | 0.551 | 0.357 | 0.360 |
| Week 20 | 84.88 (1.81) | 81.28, 88.49 | 87.22 (1.92) | 83.42, 91.01 | -0.43 | |
| Light sleep duration (min) | | | | | | | | | |
| Week 8 | 223.75 (3.35) | 217.12, 230.38 | 214.89 (3.35) | 208.25, 221.53 | 0.62 | | 0.471 | 0.004 | 0.026 |
| Week 20 | 225.65 (3.46) | 218.80, 232.50 | 228.36 (3.78) | 220.89, 235.82 | -0.31 | |
| Rapid eye movement sleep, REM sleep duration (min) | | | | | | | | | |
| Week 8 | 87.05 (1.68) | 83.71, 90.38 | 70.97 (1.68) | 67.63, 74.30 | 2.76 | | <0.001 | 0.004 | 0.205 |
| Week 20 | 82.62 (1.72) | 79.22, 86.03 | 69.18 (1.83) | 65.55, 72.81 | 2.31 | |

**Note:**(a) Missing data were not imputed. EMM (SE) was estimated marginal means (standard error) derived from linear mixed-effects models. (b) The baseline scores of outcomes were adjusted as covariates in their models. (c) Cohen’s *d* was calculated for between-group differences at each time point using the formula: *d* *=*(*MiMBCT-I -MSHE*)/*SDpooled*, where *M* represents the estimated marginal mean at each time point and *SDpooled* is the residual standard deviation from the model. (d) iMBCT-I: internet-delivered Mindfulness-Based Cognitive Therapy for Insomnia; SHE: Sleep Hygiene Education; 95% CI: 95% Confidence Interval; ITT = intention-to-treat.

**Supplementary Table 7. Comparison of the Changes in Sleep Condition, Depressive and Anxiety Symptoms, and Quality of Life from Week 0 to Week 8 (Sensitivity Analysis Using Pre-protocol Dataset)**

| Outcome | iMBCT-I  (*n* = 36) | SHE  (*n* = 35) | Between-Group Difference  (95% CI) | *t* | *p* |
| --- | --- | --- | --- | --- | --- |
| Mean (*SD*) | Mean (*SD*) |
| Insomnia Severity Index, ISI (score) | -9.39(3.64) | -4.71(4.11) | -4.67 (-6.51,-2.84) | -5.078 | <0.001 |
| Pittsburgh Sleep Quality Index, PSQI (score) | -3.14(2.31) | -1.26(2.29) | -1.88 (-2.97,-0.79) | -3.447 | 0.001 |
| Patient Health Questionnaire-9, PHQ-9 (score) | -2.72(4.29) | -1.66(4.08) | -2.88 (-4.65,-1.12) | -3.270 | 0.002 |
| Generalized Anxiety Disorder 7-item scale, GAD-7 (score) | -3.03(3.97) | -0.14(3.43) | -1.06 (-3.05,0.92) | -1.072 | 0.288 |
| 12-item Short Form Health Survey, SF-12 (score) | | | | | |
| Physical Component Summary, PCS (score) | 2.15(6.25) | -0.95(6.77) | 3.11 (0.03, 6.19) | 2.011 | 0.048 |
| Mental Component  Summary, MCS (score) | 6.11(8.51) | 1.34(8.73) | 4.77 (0.69,8.85) | 2.332 | 0.023 |

**Note:** Missing data were not imputed; iMBCT-I: internet-delivered Mindfulness-Based Cognitive Therapy for Insomnia; SHE: Sleep Hygiene Education; PP: per-protocol ; SD: standard deviation; 95% CI: 95% Confidence Interval

**Supplementary Table 8. Comparison of the Changes of Subjective and Objective Sleep Data from Week 0 to Week 8 (Sensitivity Analysis Using Pre-protocol Dataset)**

| Outcome | iMBCT-I  (*n* = 34) | SHE  (*n* = 31) | Between-Group Difference  (95% CI) | *t* | *p* |
| --- | --- | --- | --- | --- | --- |
| Mean (*SD*) | Mean (*SD*) |
| **Sleep diary** | | | | | |
| Sleep onset latency, SOL (min) | -20.84 (33.03) | 3.19 (28.87) | -24.03 (-39.48, 8.59) | -3.110 | 0.003 |
| Number of awakenings | 0.85 (0.15) | 1.18 (0.22) | -0.33 (-0.85, 0.20) | -1.250 | 0.216 |
| Wake time after sleep onset, WASO (min) | -17.81 (23.20) | 2.69 (15.78) | -20.50 (-30.43, -10.57) | -4.124 | <0.001 |
| Total sleep time, TST (min) | 15.87 (73.12) | 2.57 (46.05) | 13.30 (-17.33, 43.94) | 0.868 | 0.389 |
| Sleep efficiency, SE | 0.09 (0.17) | -0.01 (0.07) | 0.10 (0.03, 0.17) | 2.950 | 0.004 |
| **Actigraphy** | | | | | |
| Number of awakenings | -0.19 (0.63) | 0.12 (0.75) | -0.31 (-0.66, 0.03) | -1.828 | 0.072 |
| Wake time after sleep onset, WASO (min) | -6.01 (17.26) | 4.52 (22.53) | -10.53 (-20.42, -0.63) | -2.125 | 0.037 |
| Total sleep time, TST (min) | 40.16 (34.03) | 13.58 (31.13) | 26.58 (10.36, 42.80) | 3.275 | 0.002 |
| Deep sleep duration (min) | -0.37 (20.61) | 2.95 (14.54) | -3.32 (-12.11,5.48) | -0.743 | 0.460 |
| Light sleep duration (min) | 15.35 (27.84) | 4.80 (22.99) | 10.55 (-2.18,23.28) | 1.657 | 0.103 |
| Rapid eye movement sleep, REM sleep duration (min) | 25.42 (17.13) | 5.83 (12.18) | 19.59 (12.15, 27.02) | 5.264 | <0.001 |

**Note:** Missing data were not imputed; iMBCT-I: internet-delivered Mindfulness-Based Cognitive Therapy for Insomnia; SHE: Sleep Hygiene Education; PP: per-protocol ; SD: standard deviation; 95% CI: 95% Confidence Interval


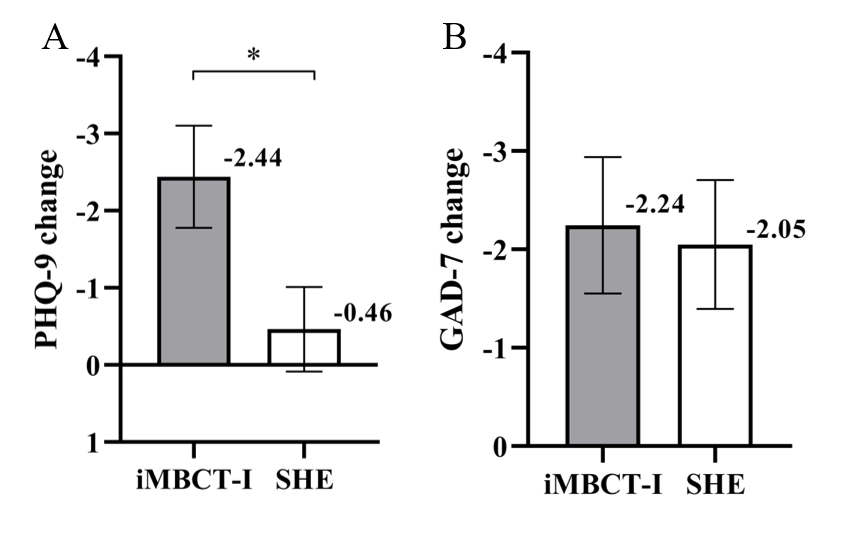


**Supplementary Figure 1. Comparison of the Mean Change Scores of Depressive and Anxiety Symptoms from Week 0 to Week 8 (ITT analysis)**

1. Changes in Patient Health Questionnaire-9 (PHQ-9). (B) Changes in Generalized Anxiety Disorder 7-item scale (GAD-7).

**Note:** iMBCT-I: internet-delivered Mindfulness-Based Cognitive Therapy for Insomnia; SHE: Sleep Hygiene Education; Error bars represent standard errors; ITT: intention-to-treat; * *p* < 0.05

**
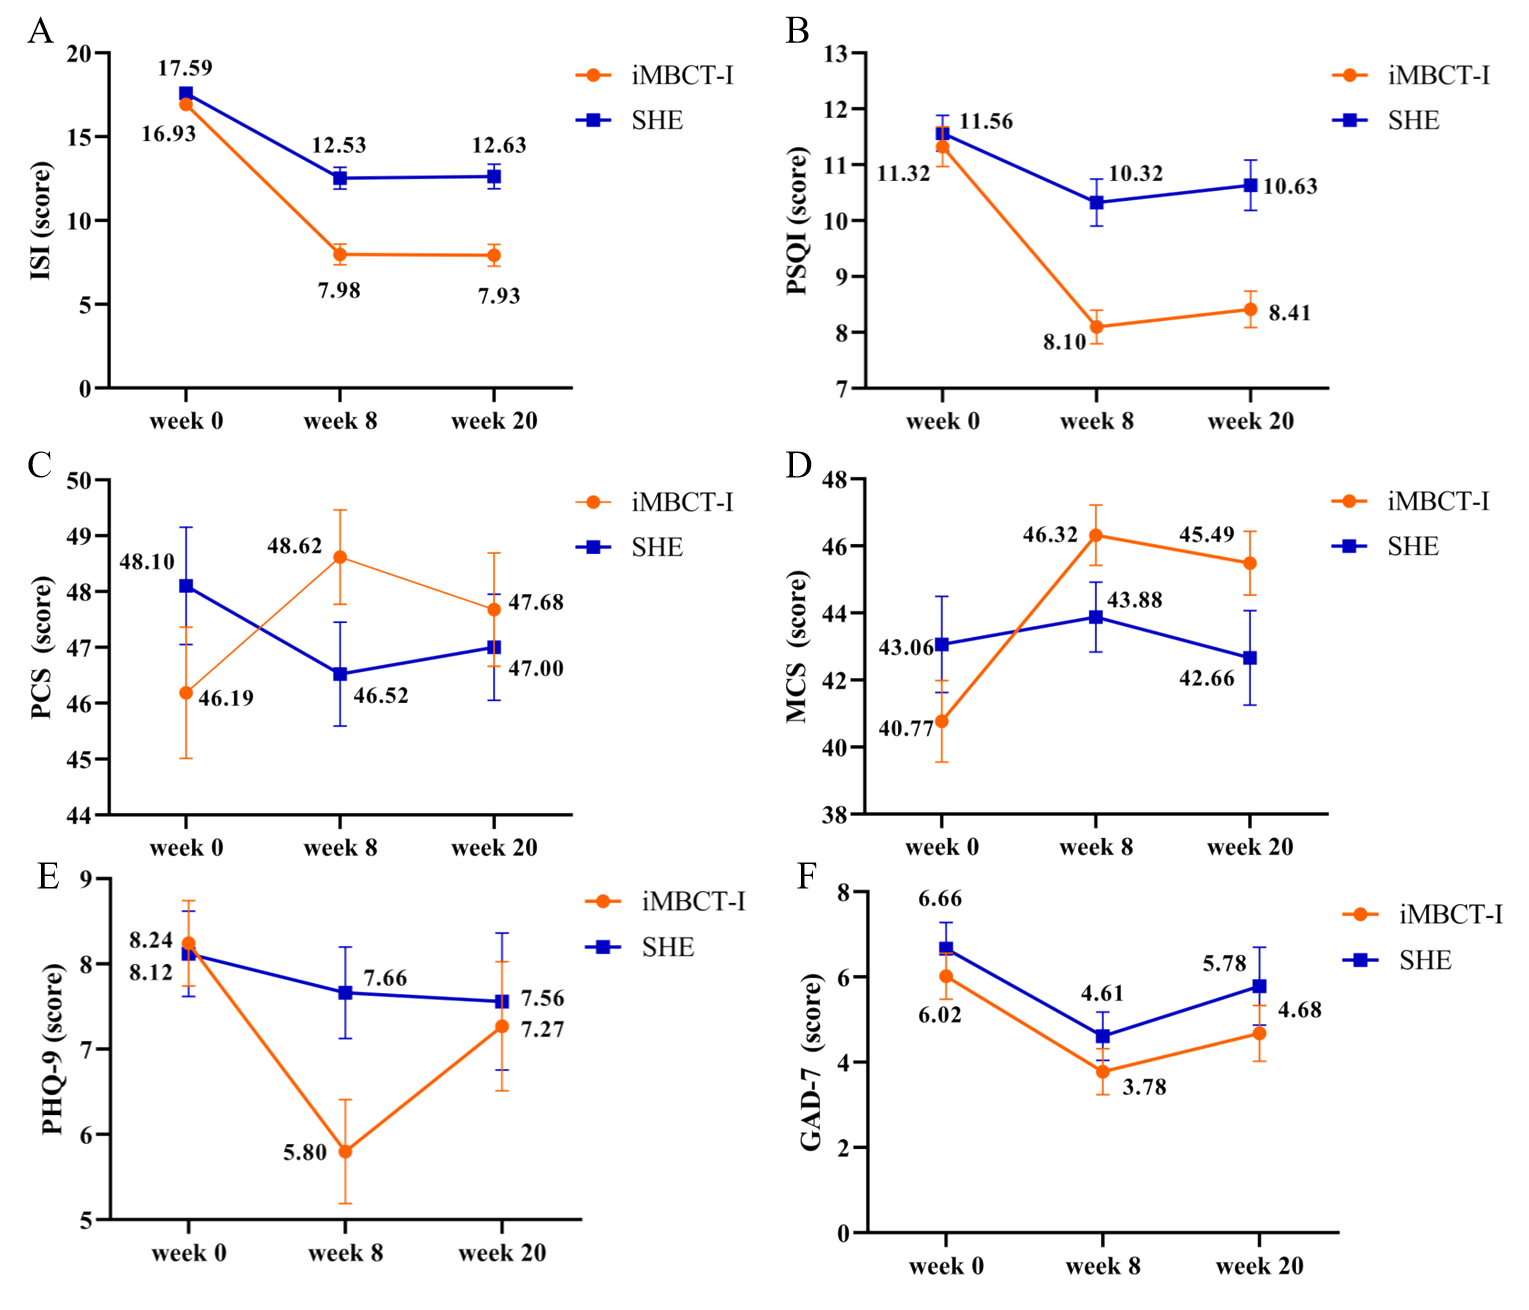
**

**Supplementary Figure 2. Changes in the scores of ISI, PSQI, PCS, MCS, PHQ-9, and GAD-7 from week 0 to week 20 in both groups (ITT analysis)**

1. Changes in the score of Insomnia Severity Index (ISI). (B) Changes in the score of Pittsburgh Sleep Quality Index (PSQI). (C) Changes in in the score of Physical Component Summary (PCS) of 12-item Short Form Health Survey (SF-12). (D) Changes in in the score of Mental Component Summary (MCS) of SF-12. (E) Changes in in the score of Patient Health Questionnaire-9 (PHQ-9). (F) Changes in in the score of Generalized Anxiety Disorder 7-item scale (GAD-7).

**Note:** iMBCT-I: internet-delivered Mindfulness-Based Cognitive Therapy for Insomnia; SHE: Sleep Hygiene Education; ITT: intention-to-treat; Error bars represent standard errors.

**
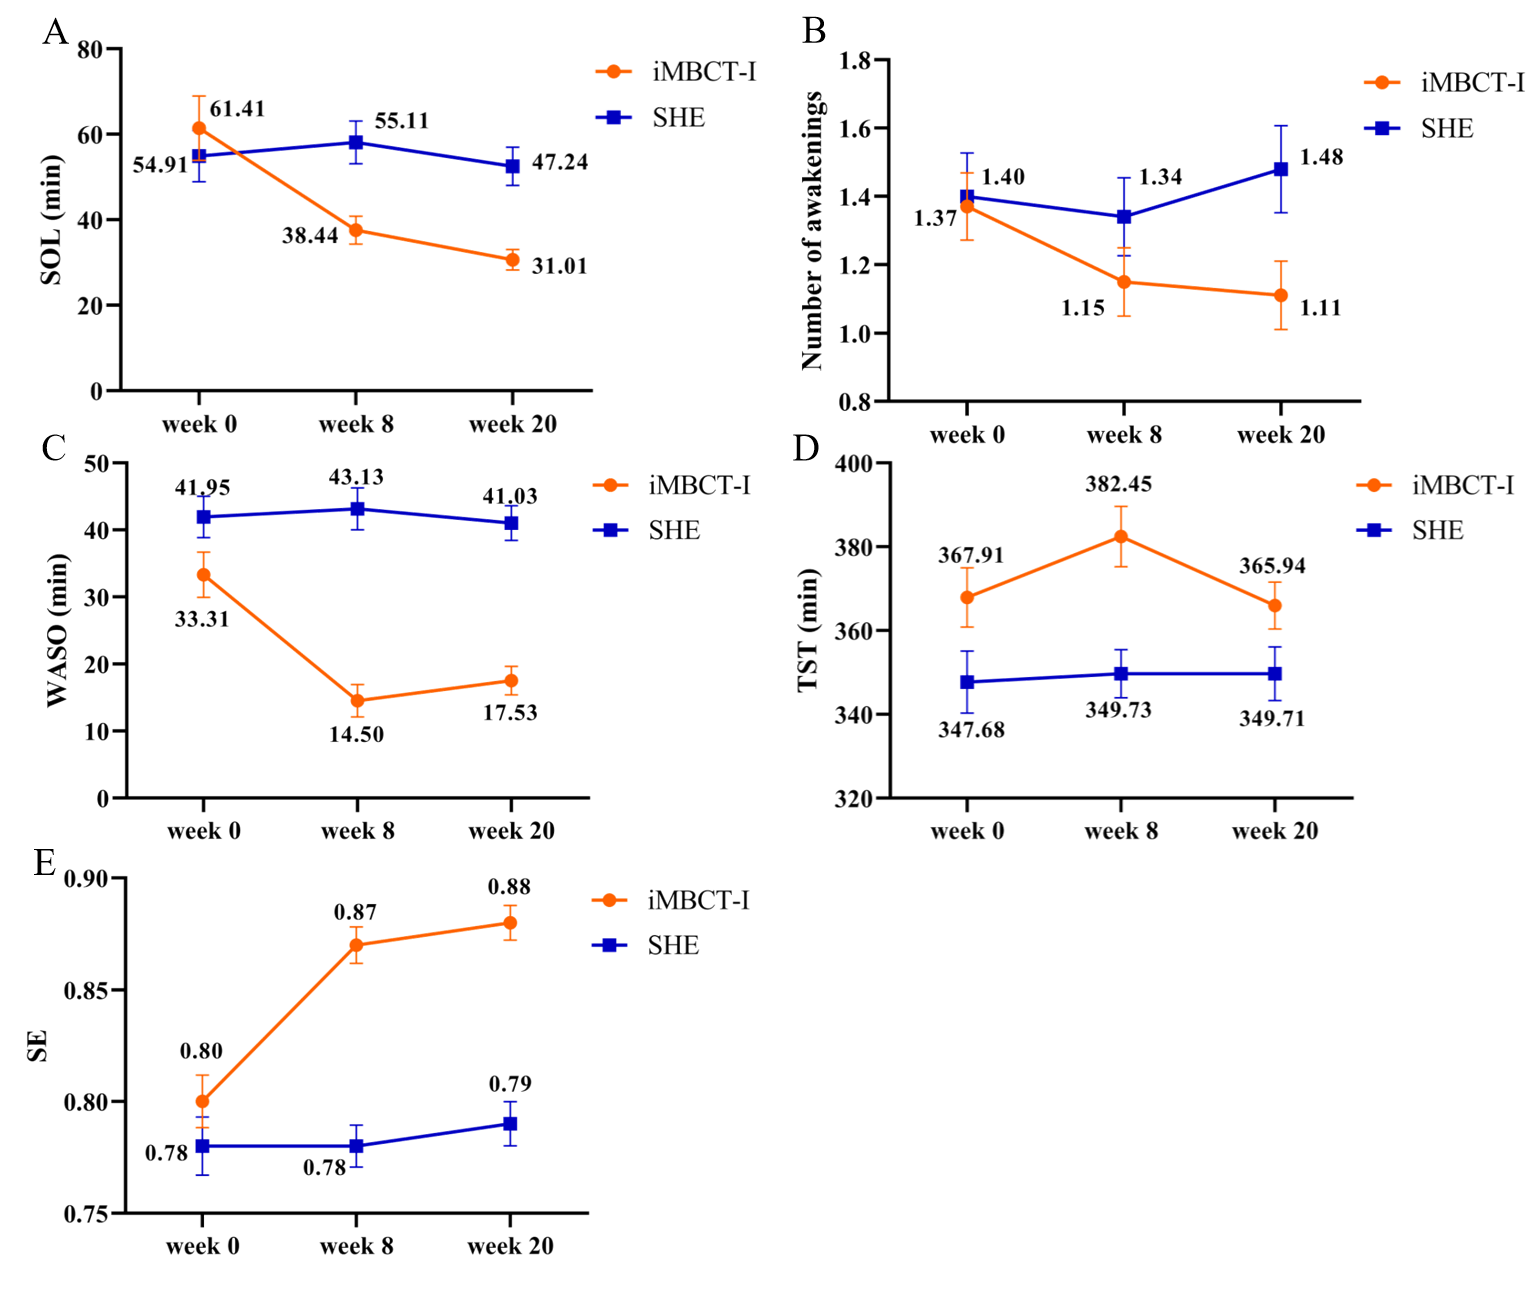
**

**Supplementary Figure 3. Changes in Sleep Diaries from Week 0 to Week 20 between the iMBCT-I Group and SHE Group (ITT Analysis)**

1. Changes in sleep onset latency (SOL). (B) Changes in number of awakenings. (C) Changes in wake time after sleep onset (WASO). (D) Changes in total sleep time (TST). (E) Changes in sleep efficiency (SE).

**Note:** iMBCT-I: internet-delivered Mindfulness-Based Cognitive Therapy for Insomnia; SHE: Sleep Hygiene Education; ITT: intention-to-treat; Error bars represent standard errors of the mean

**
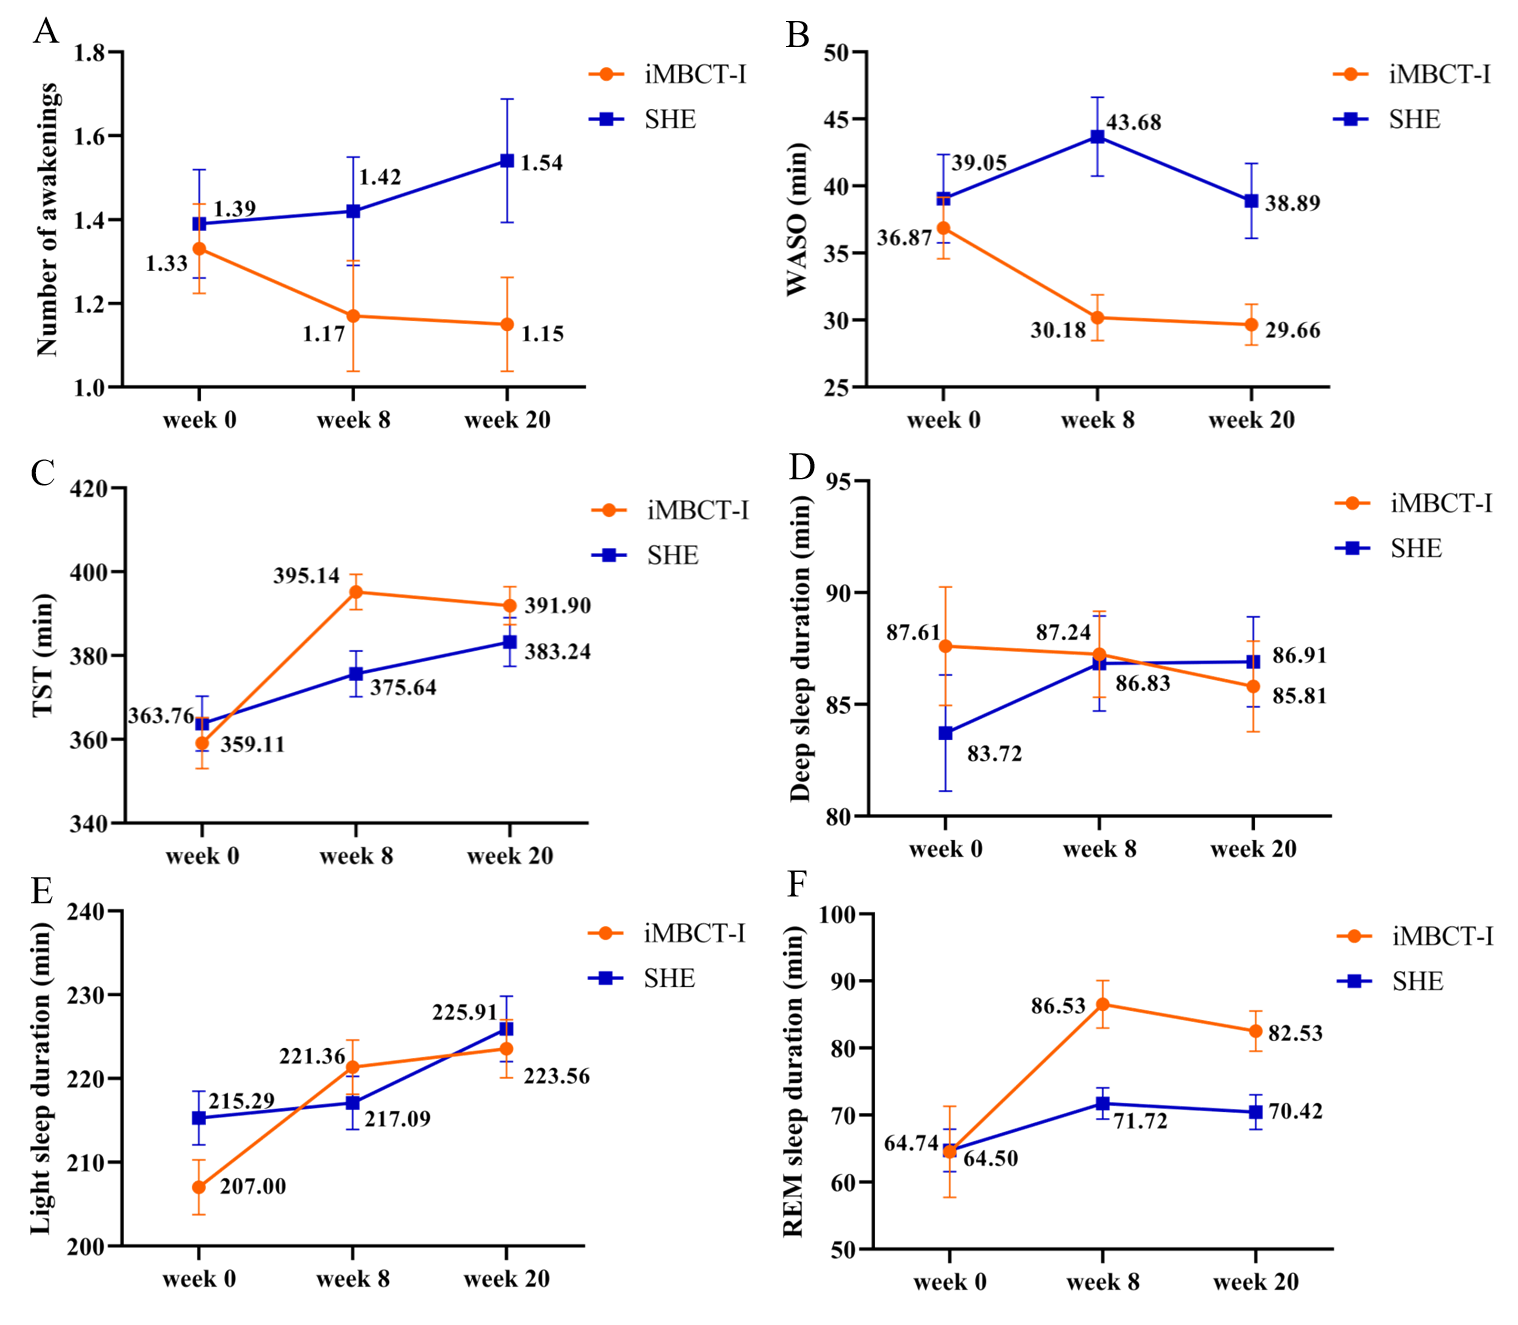
**

**Supplementary Figure 4. Changes in Actigraphy from Week 0 to Week 20 between the iMBCT-I Group and SHE Group (ITT Analysis)**

1. Changes in number of awakenings. (B) Changes in wake time after sleep onset (WASO). (C) Changes in total sleep time (TST). (D) Changes in deep sleep duration. (E) Changes in light sleep duration. (F) Changes in rapid eye movement sleep (REM) sleep duration.

**Note:** iMBCT-I: internet-delivered Mindfulness-Based Cognitive Therapy for Insomnia; SHE: Sleep Hygiene Education; ITT: intention-to-treat; Error bars represent standard errors of the mean
